# Supplementary material
Source: PubMed Central journal article supplement (PMC2802452)

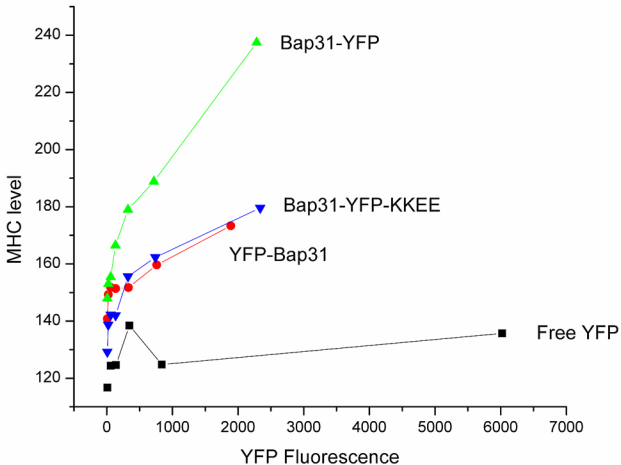

Supplement: NIHMS162589-supplement-Supplement_Fig_1.pdf [file NIHMS162589-supplement-Supplement_Fig_1.pdf]

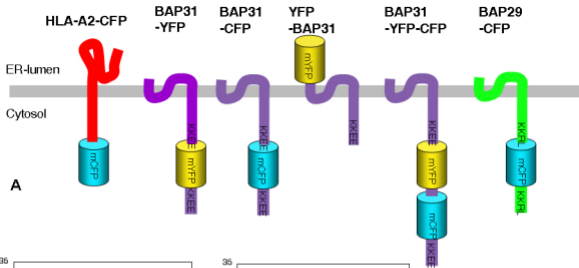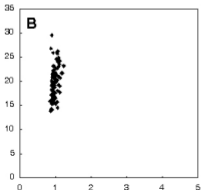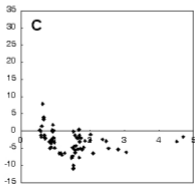

Supplement: NIHMS162589-supplement-Supplement_Fig_2.pdf [file NIHMS162589-supplement-Supplement_Fig_2.pdf]
